# MIND TO MIND

*Creative writing that explores the abstract side  
of our profession and our lives*

Carol Wiley Cassella, M.D., Editor

## Phantom Limb Pain

Eric Hanson, M.D.

T

This lithe arm swung the hammer that forged my home  
Old Doctor Sawbones did visit my tent last night  
These mighty legs gave force as I plowed the loam  
I lay dying in the embers of Shiloh's fight

This addled arm raised cotton as his Lord  
As I fade in to the black of ether's sleep  
These youthful legs drawn by Dixie's tune to war  
I pray for my arms and legs to keep

This hating arm laid lashes to the Negro's welt  
My limb lays lifeless as the ground grows colder  
These legs before a weeping God have knelt  
Blood tainted cotton to allay my shoulder

This soft and pious arm did hold my child  
Once a master and Lincoln's bane  
These tired legs grow weary with the passing miles  
I lay shattered and humbled by phantom pain

This angry arm bore the weapons of strife  
In this land my father is buried and did toil  
These bleeding legs have no hunger for life  
On thanatopsis, our limbs shall return as Free soil

---

From Hickory, North Carolina. ewhanson12@gmail.com

Accepted for publication February 12, 2015.

Copyright © 2015, the American Society of Anesthesiologists, Inc. Wolters Kluwer Health, Inc. All Rights Reserved. Anesthesiology 2016; 124:509
